# Supplementary material for: The Functionality Assessment Flowchart (FAF): a new simple and reliable method to measure performance status with a high percentage of agreement between observers
Source: Springer Nature journal article supplement (doi:10.1186/s12885-015-1526-0), 2015-07-04
Supplement: MOESM1 [file 9744836]

Você se sente capaz de trabalhar ou de fazer suas atividades habituais (como sempre fez)?

Sim

Não

Não,  
Nenhum  
**100%**

Você sente algum sintoma  
(desconforto físico)?

Você fica sentado(a) ou deitado(a)  
mais da metade do seu dia?

Não

Sim

Sim

**O quanto este sintoma lhe incomoda?**

*(responda considerando apenas o sintoma mais importante na sua opinião)*

Muito pouco (**90%**), pouco (**90%**), mais ou menos (**90%**), muito (**80%**), muitíssimo (**80%**)?

Maior parte de tempo sentado  
ou deitado **50%**  
Maior parte do tempo  
acamado **40%**

**Totalmente acamado**

Não

Para cuidar de si mesmo (a), você  
necessita de auxílio de outras pessoas?

Como tem sido sua  
alimentação?

Nenhum  
auxílio  
**70%**

Assistência ocasional  
(algumas vezes) **60%**

Assistência  
considerável  
(muitas vezes)  
**50%**

Alimentação normal ou  
quase normal **30%**

Comendo pouco ou muito  
pouco **20%**
